# Supplementary material
Source: publisher site journal article supplement (http://kjim.org/upload/media/kjim-2021-088-suppl10.pdf)
Supplement: Supplementary file 1 [file kjim-2021-088-suppl10.pdf]

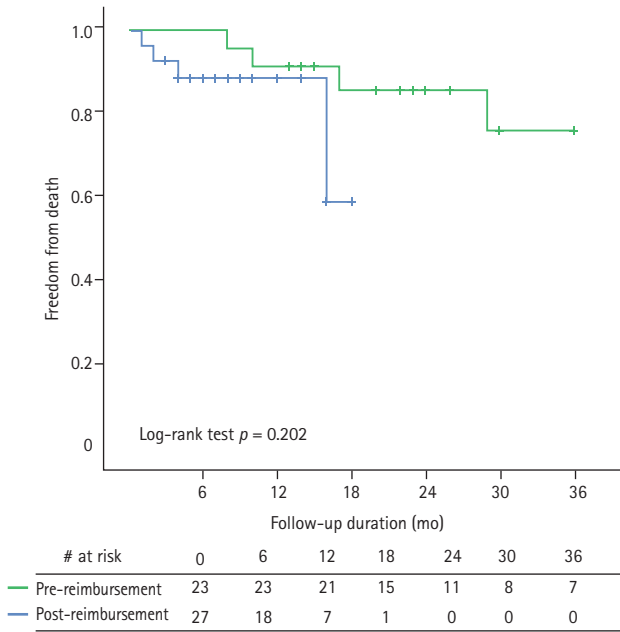

**Supplementary Figure 2.** Three-year survival before and after reimbursement. Overall survival up to 3 years were similar before and after reimbursement. The national insurance commenced reimbursement for pre-approved cases since October, 2018.
